# Supplementary material for: Epidemiology of Progressive Supranuclear Palsy: Real World Data from the Second Largest Health Plan in Israel
Source: MDPI journal article supplement (doi:10.3390/brainsci12091126), 2022-08-24
Supplement: s1 [file s1]

## Supplementary Materials

**Table S1: Treatment patterns by pharmacological groups.**

|                       | One year prior index | One year post index |
|-----------------------|----------------------|---------------------|
| Antiparkinson         | 50 (56.8%)           | 67 (76.1%)          |
| Analgesic/antipyretic | 33 (37.5%)           | 44 (50.0%)          |
| Gastro-intestinal     | 41 (46.6%)           | 48 (54.5%)          |
| Antidepressant        | 51 (58.0%)           | 57 (64.8%)          |
| Genital/urinary       | 30 (34.1%)           | 36 (40.9%)          |
| Hypnotic/sedative     | 35 (39.8%)           | 41 (46.6%)          |
| Antidementia          | 15 (17.0%)           | 19 (21.6%)          |
| Laxative              | 37 (42.0%)           | 41 (46.6%)          |
| Antithrombotic agents | 58 (65.9%)           | 60 (68.2%)          |
| Antibiotics           | 44 (50.0%)           | 46 (52.3%)          |
| Eye preparations      | 38 (43.2%)           | 38 (43.2%)          |
| Antidiabetic          | 15 (17.0%)           | 15 (17.0%)          |
| Cardiovascular        | 58 (65.9%)           | 58 (65.9%)          |
| Respiratory system    | 12 (13.6%)           | 12 (13.6%)          |
| Antipsychotic         | 10 (11.4%)           | 9 (10.2%)           |
| Hypolipidemic         | 48 (54.5%)           | 44 (50.0%)          |
| Antivertigo           | 18 (20.5%)           | 7 (8.0%)            |
